# Supplementary material for: Dynamic microRNA-101a and Fosab expression controls zebrafish heart regeneration
Source: Oxford University Press journal article supplement (doi:10.1242/dev.126649), 2015-12-01
Supplement: dev126649supp.pdf [file dev126649supp.pdf]

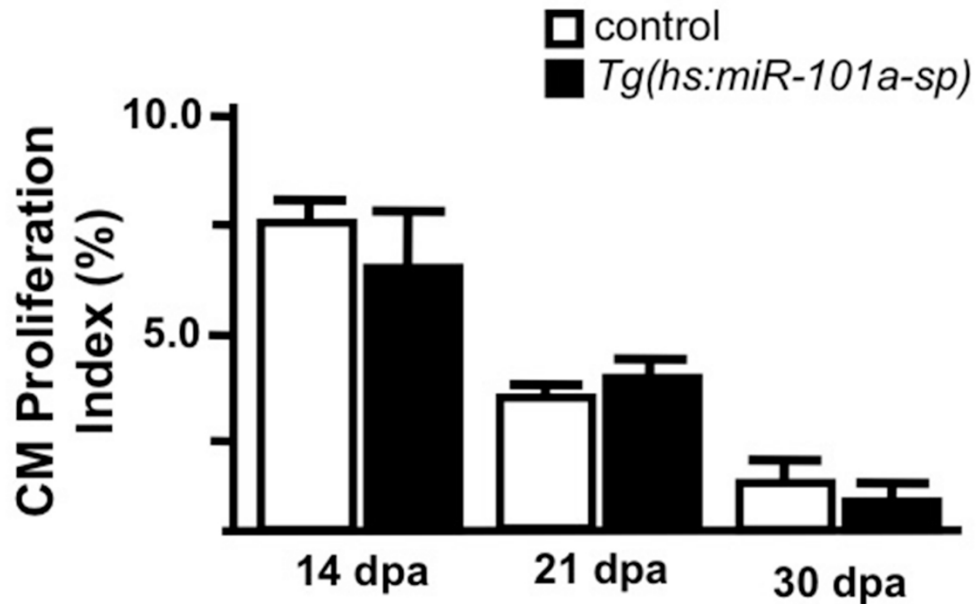

**Fig. S1. CM proliferation indices in *Tg(hs:miR-101a-sp)* hearts at later stages of heart regeneration.** Control or *Tg(hs:miR-101a-sp)* animals were injured, subjected to daily heat-treatment and processed to identify proliferating CMs. CM proliferation indices were determined by representing Mef+PCNA+ cells as a percentage of total Mef2+ cells. CM proliferation indices in *Tg(hs:miR-101a-sp)* hearts were comparable to control hearts at later stages of regeneration. (n=6-8; error bars represent SEM).

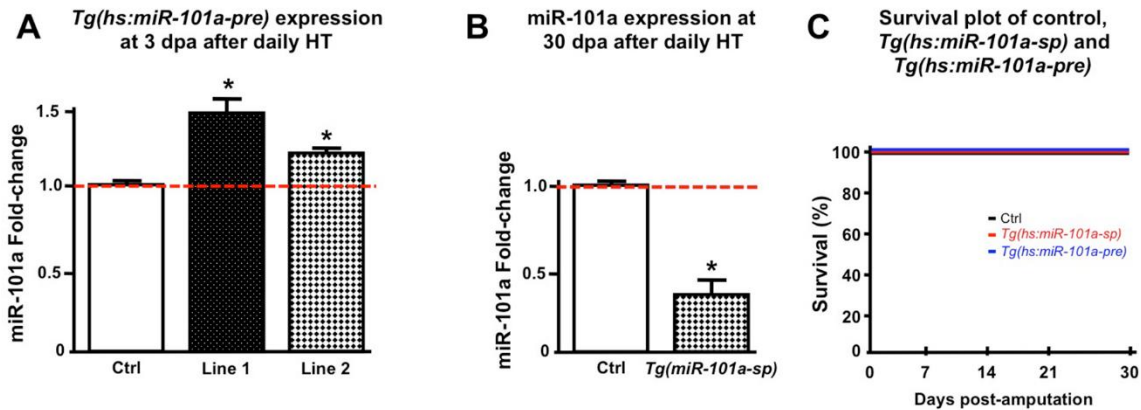

**Fig. S2. Transgenic modulation of miR-101a *in vivo* alters miR-101a expression.** (A) Heat-activation of miR-101a overexpression strains, *Tg(hs:miR-101a-pre)*, led to an increase in miR-101a expression at 3 dpa in two independent strains, as revealed by qPCR. (B) Long-term daily heat-treatment of *Tg(hs:miR-101a-sp)* animals significantly suppressed miR-101a expression by ~65% in injured hearts at 30 dpa. (C) Daily heat-treatment of control, *Tg(hs:miR-101a-sp)* and *Tg(hs:miR-101a-pre)* animals did not significantly affect mortality. (n=8-10; \*=Student's t-test p-value<0.05; error bars represent SEM).

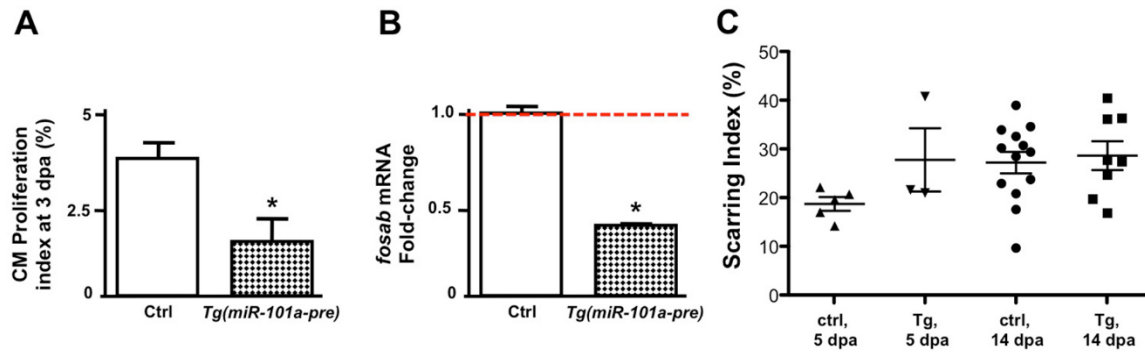

**Fig. S3. Overexpression of miR-101a with *Tg(hs:miR-101a-pre)* strain inhibits CM proliferation.** Control and *Tg(hs:miR-101a-pre)* hearts were resected, subjected to daily HT and extracted at 3 dpa for histology. Hearts were cryosectioned at 10 $\mu$ m, stained to detect Mef2 and PCNA and CM proliferation indices were determined. **(A)** When compared to control, overexpression of miR-101a reduced CM proliferation indices from 4.1% to 2.2%. **(B)** *fosab* expression in *Tg(hs:miR-101a-pre)* hearts was reduced by 55% when compared to heat-treated control hearts. **(C)** Sustained overexpression of miR-101a did not alter scar tissue formation in injured hearts. Scarring indices between in *Tg(hs:miR-101a-pre)* hearts at 5 and 14 dpa were not significantly different in comparison to controls. (\*=Student's t-test p-value<0.05; error bars represent SEM).

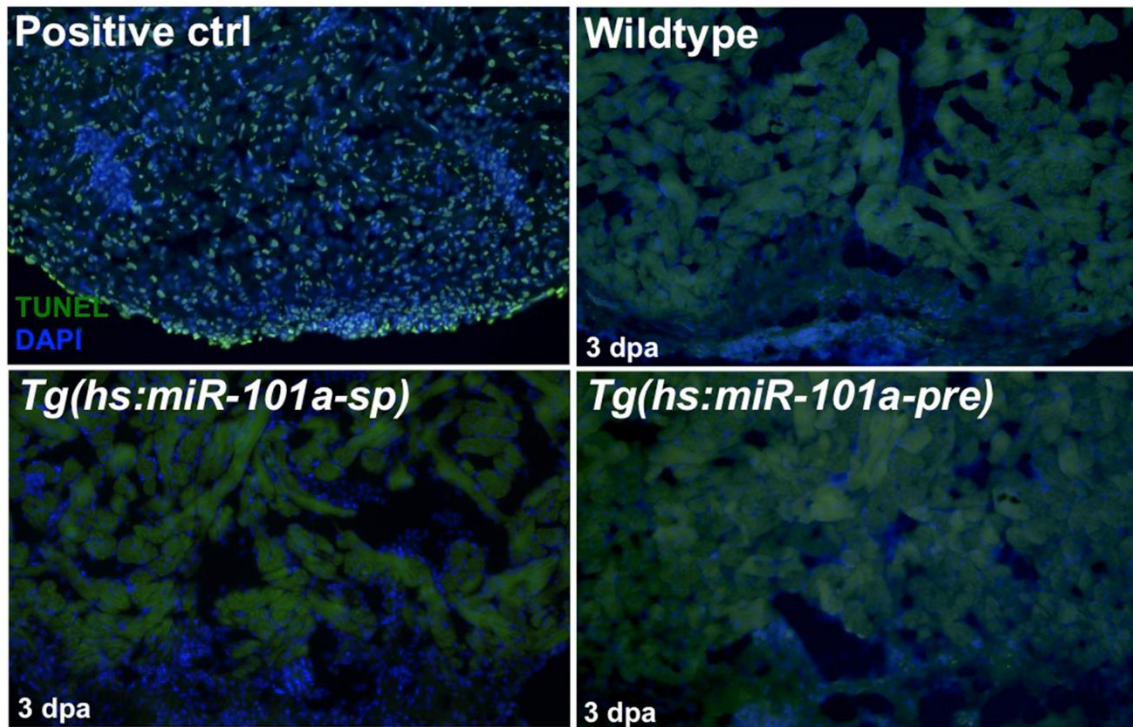

**Fig. S4. Activation of *Tg(hs:miR-101a-sp)* and *Tg(hs:miR-101a-pre)* did not induce ectopic-programmed cell death.** Control, *Tg(hs:miR-101a-sp)* and *Tg(hs:miR-101a-pre)* hearts were injured, heat-treated and extracted at 3 dpa for analysis of programmed cell death by TUNEL staining. We observed no differences in TUNEL+ cells between control and transgenic animals. An uninjured wildtype heart treated with DNaseI served as a positive control.

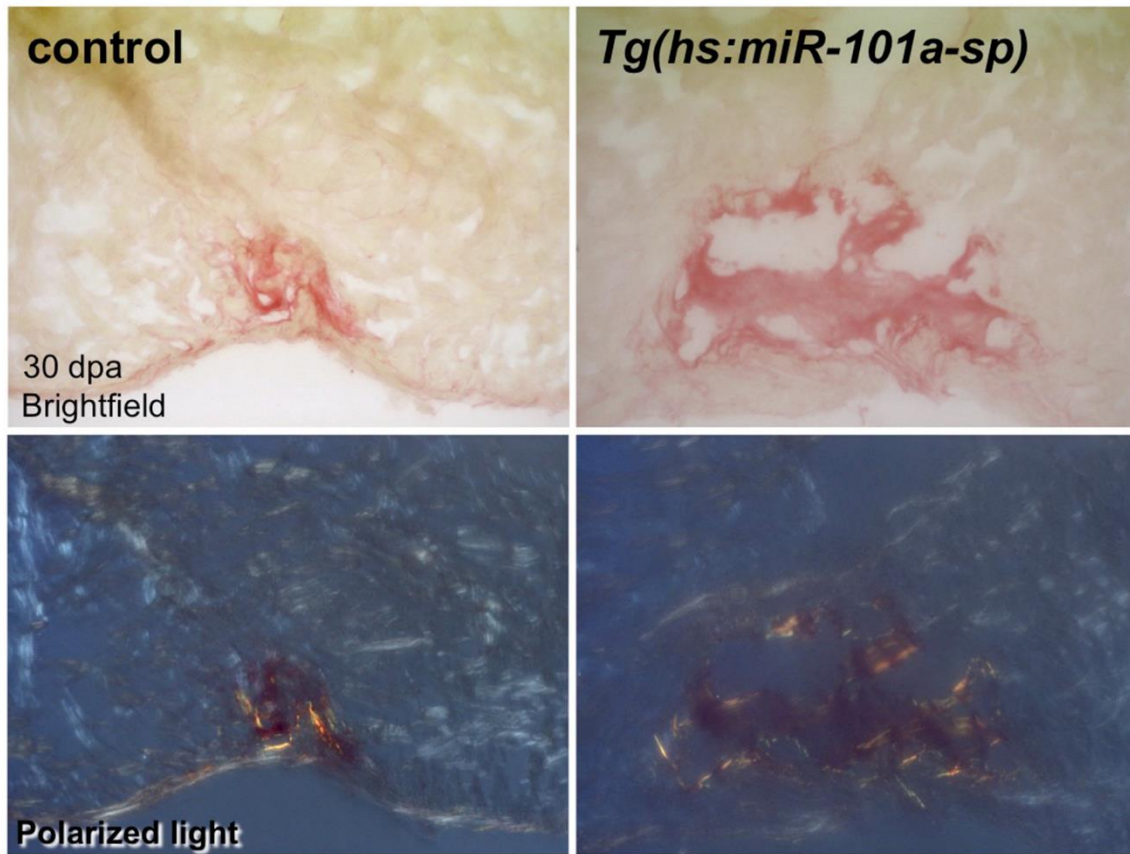

Orange/red fibers- thick fibers: type I  
Green/yellow fibers- thin fibers: type III

**Fig. S5. Sustained depletion of miR-101a activity did not alter scar tissue composition.** Control and *Tg(hs:miR-101a-sp)* hearts were resected, subjected to daily heat-treatment and processed for Sirius Red staining. Collagen composition in both control and *Tg(hs:miR-101a-sp)* hearts is primarily thick fibers (collagen type I, orange).

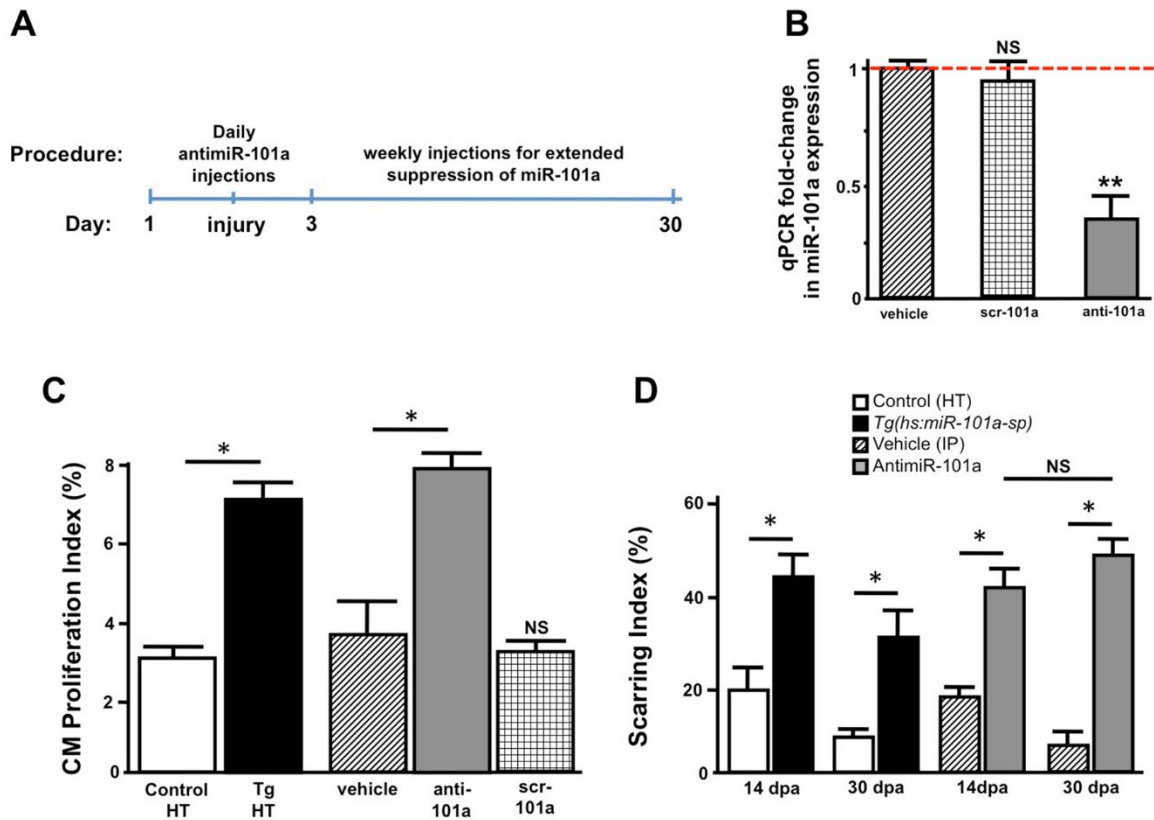

**Fig. S6. LNA anti-miR-101a treatment recapitulates *Tg(hs:miR-101a-sp)* cardiac phenotypes.** (A) Experimental schematic of LNA anti-miR-101a treatment. (B) qPCR studies to detect miR-101a expression levels in hearts injected with vehicle, scrambled-101a and anti-miR-101a oligonucleotides reveal a significant decrease in miR-101a expression in anti-miR-101a treatment. No significant differences were observed between vehicle and scrambled-101a treatments. (C) Injured vehicle, scrambled-101a and anti-miR-101a 3 dpa hearts were collected and processed to detect proliferating CMs. Relative to controls (vehicle and scrambled-101a), treatment with anti-miR-101a increased CM proliferation indices comparably to *Tg(hs:miR-101a-sp)* indices. (D) Vehicle and anti-miR-101a treated hearts were collected at 14 and 30 dpa, stained with AFOG and quantified for collagen and fibrin deposition within the total injury area. Sustained depletion of miR-101a by anti-miR-101a led to significant scar tissue retention. (\*= Student's t-test  $p < 0.001$ ; IP=intraperitoneal; HT=heat-treatment; error bars represent SEM).

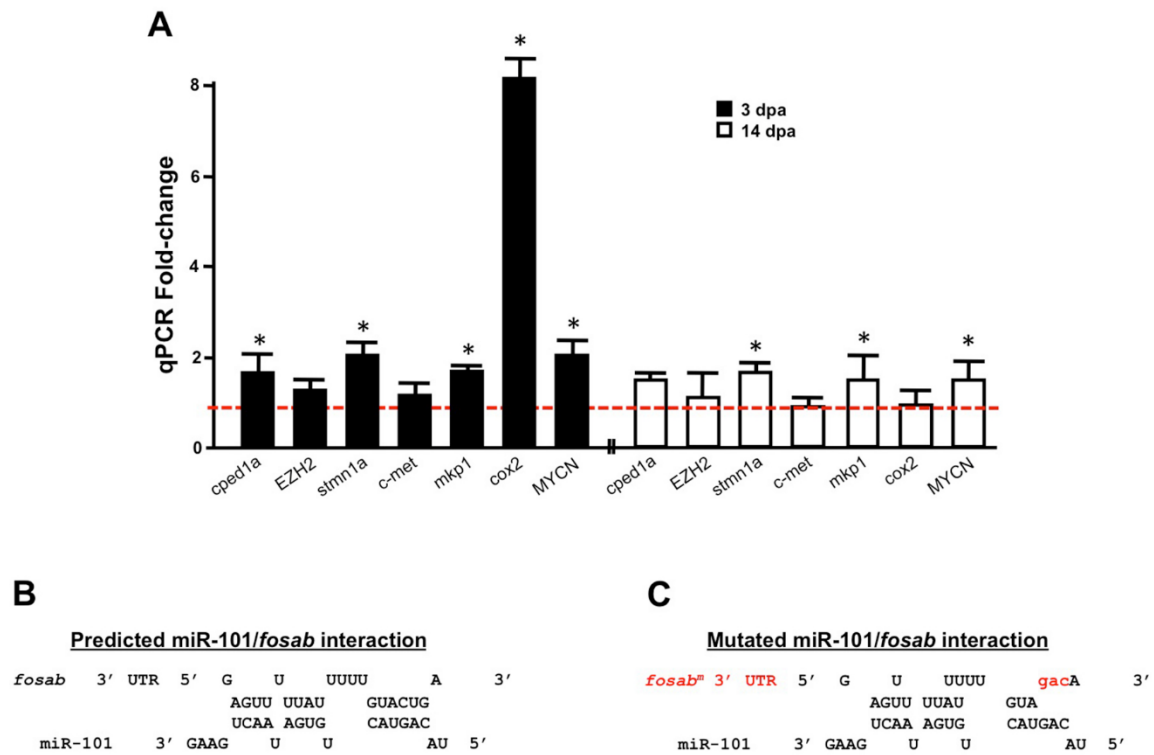

**Fig. S7. miR-101a controls expression of multiple target genes.** (A) Real-time qPCR studies of candidate miR-101 target genes at 3 and 14 dpa in *Tg(hs:miR-101a-sp)* hearts. Expression levels were normalized to  $\beta$ -actin and represented as fold-change over normalized gene expression levels in control hearts. (B) Alignment of the predicted base pair association between miR-101a and *fosab* -3'-UTR. (C) Mutation of 3-nucleotides in the *fosab*-3'-UTR is shown in red. (error bars represent SEM).

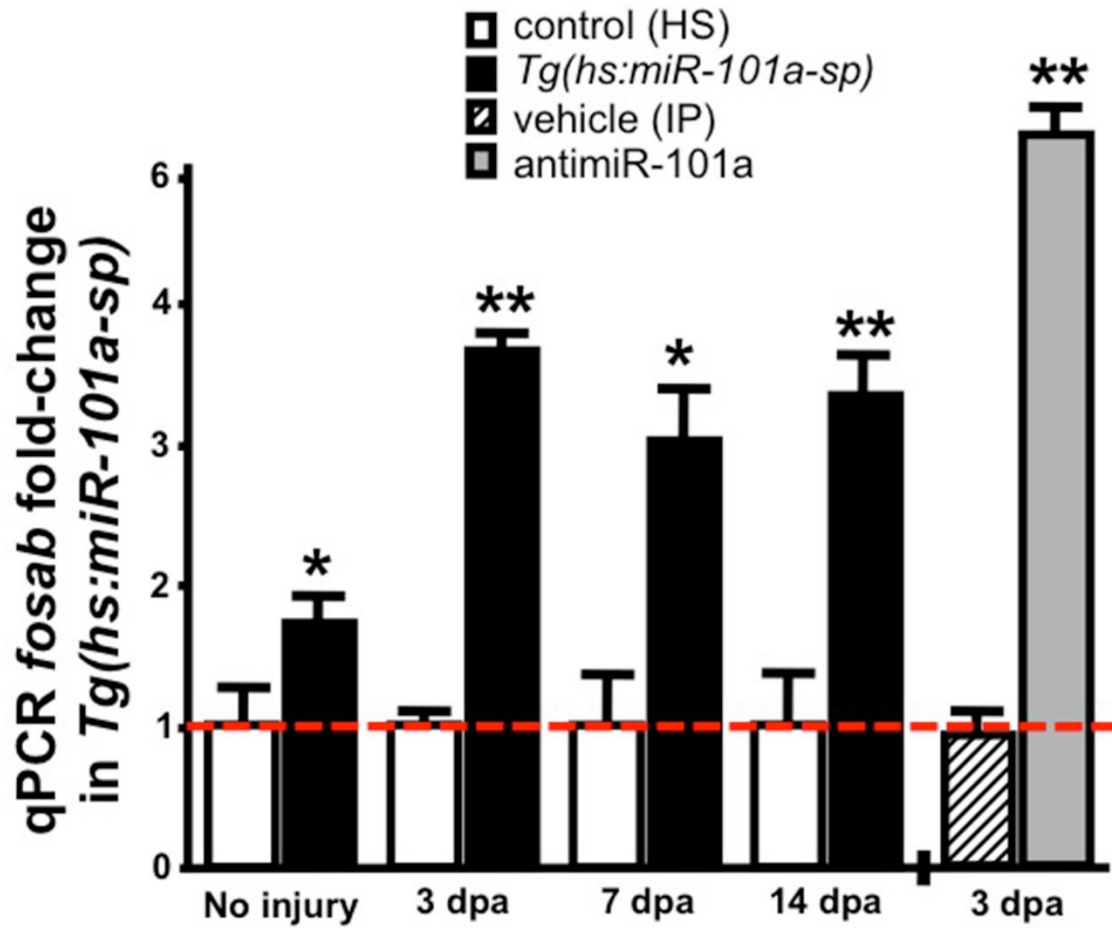

**Fig. S8. Modulation of miR-101a *in vivo* alters *fosab* expression.** *fosab* mRNA levels are significantly elevated in ventricles under conditions of miR-101a depletion with *Tg(hs:miR-101a-sp)* and anti-miR-101a treatment when compared to controls. (n=8-10; \*, \*\*=Student's t-test p-value<0.05 and 0.001; error bars represent SEM).



**Table S1. Candidate miR-101a target genes.**

| Gene Name | GenBank Accession | Description                                                               | Primer sequences for qPCR                                        |
|-----------|-------------------|---------------------------------------------------------------------------|------------------------------------------------------------------|
| MYCN      | BX005358          | v-myc avian myelocytomatosis viral oncogene neuroblastoma derived homolog | FP: 5'-ACAGCAGCACTATAACT-3'<br>RP: 5'-GAGTGAGGAAGCTAGAC-3'       |
| STMN1A    | C R925717         | stathmin1a                                                                | FP: 5'-CTTTCCTTGGTGGAGAT-3'<br>RP: 5'-GCCATAATTGCTGTCTCG-3'      |
| CPEB1A    | AL929134          | cytoplasmic polyadenylation element binding protein 1a                    | FP: 5'-CAGACAAGCACAAAGTATC-3'<br>RP: 5'-TGACCGACAGTAGTATTTA-3'   |
| C-MET     | DP000237          | MET proto-oncogene, receptor tyrosine kinase                              | FP: 5'-GAACTCCTTCGACATTAC-3'<br>RP: 5'-TG TTCAGGAGGATGTAG-3'     |
| MKP-1     | CR381700          | dual specificity phosphatase 1                                            | FP: 5'-CTAGAGATGGGAGAAGTG-3'<br>RP: 5'-CATGTGTTACAGGAGGA-3'      |
| PTGS2A    | CU570979          | prostaglandin-endoperoxide synthase 2a                                    | FP: 5'-AACTCTATCGTCACCAC-3'<br>RP: 5'-CCTGTCATCTCTCAAAA-3'       |
| FOSAB     | AL929435          | murine osteosarcoma viral oncogene homolog Ab                             | FP: 5'-GCTCCATCTCAGTCCCAGAG-3'<br>RP: 5'-AGAGTGGGCTCCAGATCAGA-3' |
| EZH2      | BX005392          | enhancer of zeste 2 polycomb repressive complex 2 subunit                 | FP: 5'-GTGGAAACCAAAGCCACTGT-3'<br>RP: 5'-CCAACACCACATGAAAGTGC-3' |

**Table S2. PCR primers and their application.**

| Gene Name | Application                                 | Primer sequences                                                                            |
|-----------|---------------------------------------------|---------------------------------------------------------------------------------------------|
| FOSAB     | PCR amplification of 3'-UTR for EGFP sensor | FP: 5'-CTCGAGATGCTATGGAAGTGACTCTAAAGCAAT-3'<br>RP: 5'-TCTAGAATGCAAACAATTCGCAAGTTCACATT T-3' |

|          |                                             |                                                                                                                     |
|----------|---------------------------------------------|---------------------------------------------------------------------------------------------------------------------|
|          | assay                                       |                                                                                                                     |
| miR101a  | <i>Tg(hs:miR-101a-pre)</i> strain construct | FP: 5'-GTAAAGTCTAAGTTGTCGTCC-3'<br>RP: 5'-CCCCACACAATTTCTTATT-3'                                                    |
| miR-101a | RNA duplex for EGFP sensor assay            | FP: 5'-rUrArCrArGrUrArCrUrGrUrGrArUrArArCrUrGrArArGTT-3'<br>RP:5'-rCrUrUrCrArGrUrUrArUrCrArCrArGrUrArCrUrGrArATT-3' |

**Table S3. Predicted miR-101a binding site in candidate target genes.**

| Gene Name | Predicted miR-101a binding site highlighted                                                                                                                                                                                                                                                                                                                                                                                                                                                                                                                                                                                                                                                                                                                                                                                                                                                                                                                                                                                                                                                                                                                                                            |
|-----------|--------------------------------------------------------------------------------------------------------------------------------------------------------------------------------------------------------------------------------------------------------------------------------------------------------------------------------------------------------------------------------------------------------------------------------------------------------------------------------------------------------------------------------------------------------------------------------------------------------------------------------------------------------------------------------------------------------------------------------------------------------------------------------------------------------------------------------------------------------------------------------------------------------------------------------------------------------------------------------------------------------------------------------------------------------------------------------------------------------------------------------------------------------------------------------------------------------|
| FOSAB     | GATTCCACTAAAGACTATTAGTATTTATATCTGTGACTTGATTTTCGAATGGCATTGCAG<br>GGCTATGGAAGTGA CTCTAAAGCAATGGATATTGCTTCTATATTTATCTGAACCATAC<br>ATGCCTGCCACATGTAGCAAGATAAGCATGGATCAACTGATTTTATTTGCATTAATGAT<br>CTGGTTAGTGTGAGTTAACCTAATATAGTTATTTTTCTGAGTTTACCGGTGCTAGATTT<br>GTTGATTTAGTGTGTTCTGAGCAATAGAGA ACTATCATGTTATTTTTTTTCGGCCGTTT<br>AACGGTTGATTTCTGAACGTGTGAATGTTGTTACTCAAATGTGTGCTGCCTAACCAT<br>GCATTAATGGTCTGACGTCCAAGTATGAAGTTTTCTGTGAAAACGTAGTCTCTCTTTT<br>AATTTATG <b>GAGTTTTTATTTTGTACTGA</b> AATGTGAACCTGCGAATTGTTTGCAAAAAAC<br>AAACAAAAAACTAGACACAATAAATATTAATGTATAAACTA                                                                                                                                                                                                                                                                                                                                                                                                                                                                                                                                                                                                                              |
| PTGS2A    | AAGGTCTCAAAATCTTCAAAATCCCAGATACTTGATATGGTTTTGTAATTTATTTATTTT<br>TTATATATATTTATTTGAATAA <b>TTTATTGCAGTAGTGAT</b> TTATTGATTGTTTTTTTTTTT<br>GTATTGTGATCGATGTGCAACTTTGTTTCATAAATTCATGTGAGGTATTCGACTAATTGG<br>ACAAACACATTTCAAATGCCAATCAACTGTTGCAAATGTTTATTTTCATAAATAAAAAACA<br>AATGATATTTTGCAAAAAATAAAAAA AAAAAAAAAA                                                                                                                                                                                                                                                                                                                                                                                                                                                                                                                                                                                                                                                                                                                                                                                                                                                                                        |
| MKP-1     | ATGGTCATCATGGAAGTGCCCACTATCGATTTCGGCCTCACTTCGGGATATGTTGGAGGG<br>AGACGACCCGGATTGTTTGGTTTTGGACTGTCGCTCCTTCTTTTCTTTCAGCGTATCTCA<br>CA <b>TTTCGGGCTCCAGTAATGTGC</b> GCTTCAGTACTATCGTGCGCCGGAGGGCCAGAGGG<br>GGGCTTGGGCTTGAGCACATTGTGCCAACGAGGACACCAGGAACAGGCTTCTGTCCG<br>GGGAATACCAGAGTGTGCTTTTTCTGGATGACCACAGTCTAGAGATGGGAGAAGTGAA<br>GAAAGACGGGACTTTAATGCTCGCTGTGAACGCGTTGTGCCGCAAACAATGTGGAGCA<br>AGTGTATACCTTCTTAAAGGTGGATTTGACACATTTTCCGCTGAGTTTCTGAAAAGTG<br>TACAAAGACCGTCCCCCACAAGGCTTGAGTTTACCTCTGAGCTCCA ACTGCCATTCAA<br>ACACCGCTGATTCTCCTGTAACACATGTACAACCCCTCTGTATGATCAGGGTGGCCCT<br>GTAGAAATCCTGCCTTTCCTATATTTGGGCAGTGCTTATCACGCTTCCAGAAAAGACAT<br>GCTGGACATGTTGGGGATCACCGCTCTTATTAACGTCTCTTCCA ACTGTCCCAACCACT<br>TGAAGACCACTACCAGTACAAAAGCATTCCAGTTGAAGACAACCACAAGGCTAACATC<br>AGTTCCTGGTTCAACGAGGCCATCGAATTTATTGATTCTGTACGGAATAAAGGTGGACG<br>TGTCTTTGTTCACTGCCAAGCGGGAATCTCGCGCTCTGCCACCATCTGTCTGGCTTATCT<br>GATGCGCACCAACCGCGTCAA ACTGGAAGAGGCCTTCGAATTCGTTAAACAGCGACGC<br>AGCATCATCTGCCCAACTTCAGCTTCATGGGCCAGCTTTTACAATTTCGAGTCGCAAGT<br>TCTGGCCTCCTCTACGTGTTCTCAGAAGCAGGAAGCCCCGCCATTGGCAAGAACAGCA<br>CTGTGTTCAACTTCCCCGTCCACACAGCGGCCAGTCTCTTTTCTTCTGCAAGTCCCA<br>TCACTACCTCACCTCCTGCTGA |

|        |                                                                                                                                                                                                                                                                                                                                                                                                                                                                                                                                                                                                                                                                                                                                                                                                                                                                                                                                                                                                                                                                                                                                                                                                                                                                                                                                                                                                                                                                                                                                                                                                                                                                                                                                                        |
|--------|--------------------------------------------------------------------------------------------------------------------------------------------------------------------------------------------------------------------------------------------------------------------------------------------------------------------------------------------------------------------------------------------------------------------------------------------------------------------------------------------------------------------------------------------------------------------------------------------------------------------------------------------------------------------------------------------------------------------------------------------------------------------------------------------------------------------------------------------------------------------------------------------------------------------------------------------------------------------------------------------------------------------------------------------------------------------------------------------------------------------------------------------------------------------------------------------------------------------------------------------------------------------------------------------------------------------------------------------------------------------------------------------------------------------------------------------------------------------------------------------------------------------------------------------------------------------------------------------------------------------------------------------------------------------------------------------------------------------------------------------------------|
| MYCN   | <p>ATGCCAGCTAAAACCATGAGCTCAGATCTGGAGTTGACTCTTTGCAGCCGTGTTTCTA<br/>         CCCGGACGAGGATGACTTCTACTTCTGCAGACCAGACGCCGCACCGCCTGGTGAGGAC<br/>         ATCTGGAAGAAATTCGAGCTGCTGCCACTCCTCCTCTGTCCCCGAGCCGGGACGCGCT<br/>         TCCAGGGGACCCGGGGGAGCTGGGCGCGGTGGCTGGGGATTGCTCGCTGATGGGCTTT<br/>         GGATTAACCGACCCGTTGGACTGGGCTTCCGAGCTTCTGCTTTTACCGGGAGACGACAT<br/>         TTGGGGGGCGTTCGGACGGGGACCTCTTTGGCTCCGTTTTGGATACTACGGACAATTCCA<br/>         TCATCATTAGGACTGCATGTGGAGCGGCTTCTCGGCGCGAGAGAACTGGAGCGGGT<br/>         TGTGAATGAGAACTCGGCAAAGTCGTTCTACTCCAACCTGTACTGAAGCCGGTAAA<br/>         GACACGACAGTCAAAGCGCCCCGAAGTGAGCCACTCTATACCGGAGTGTGTGGACCCTA<br/>         CCGTGGTTTTCCCTTATCCAGTCAACAAAAGAAACGGGAGCAGCAGCAGCCAAAGTGT<br/>         GACACAAGTGAAGGAGCAACAATTGCCTCAAGTCAGTGCAGGCGAGACTCCGAGCGAC<br/>         TCTGATGATGATGATGAGGATGATGAAGATGAGGATGATGAGGAAGATGATGAAGAA<br/>         GAGGAAGAAGATGAAGAAGAGGAAGAGATTGATGTCGTCACGGTGGAGAAGAGGCGT<br/>         TCCATCACCAGCAGGACAACCAGCACTGGACTGTCTGCTGTCTCCAACTCAGGCAGG<br/>         AGGGCGACTGGGCTCAGGGGTGAGCAAAGTCCGCAGGAACTCATTTTAAAGAGGACA<br/>         GCAGCAGCCTCCATCCACCAGCAGCAACATAACTACGCAGCCCCATCCCCTTACTCCGA<br/>         ACAGCAAGACGTTCCACAGCGTCTCTCCAAGCAAGAACTCAGAATCGACAGCAGCACT<br/>         ATAACTCTACGCACTGGCAGGAACCAGAGCTCTTCTCCAAGTCCCCTACCAACAGCGT<br/>         ACCAAGTCAGCGCTTGAGGAAGAGCGACTCCAGCAGCCCCAGATGCTCCGACTCGGAG<br/>         GACAGCGAACGCAGACGCAACCACAACATCTTGGAGCGTCAGCGGCGCAATGACCTGC<br/>         GGTCTAGCTTCTCACTCTGCGGGATCAGGTGCCTGAGCTCGCACACAACGACAAGGC<br/>         AGCAAAGGTGGTCATCTAAAGAAGGCCACTGATTACGTCAGCTCCCTGGAGGCTCAG<br/>         GAGTTCGACTCCAGCAGGAGAAAGACAGATTGCAAGCCAAACGACAACAGCTCCTCC<br/>         GCAGACTTGAGCAGGCCAGGACTCGCTAA</p> |
| STMN1A | <p>ATGGCTGCTACAAGTGACATTCAGGTTAAAGAGCTGGACAAGCGTGCTTCAGGACAAG<br/>         CATTGAGGTCATCCTTGGGAGTCTGCTTCAGATGTCAAGAATGAGTTCCTTCTCTCCC<br/>         CTCCAAAGAAGAAGGACCTTTCCTTGGTGGAGATCCAGAAAAAACTTGAAGCAGCAGA<br/>         AGAGAGACGCAAGTCTCATGAAGCAGAGGTTCTGAAGCACCTAGCAGAAAAGCGTGA<br/>         GCATGAAAAGGAGGTGCTTCAGAAAGCTCTAGAAGAAAACAACAACCTCAGCAAGAT<br/>         GGCAGAAGAGAACTGAACCAGAAAATGGAGGCCAACAAAGAAAACCGTACAGCAAT<br/>         TATGGCAGCTATGAATGAGAAGTTCAAAGAAAAGGACAAGAAGATAGAAGAGGTTTCG<br/>         AAAGAACAAAGAAACCAAGAGCACAATGGTGAAGAAATCTGA</p>                                                                                                                                                                                                                                                                                                                                                                                                                                                                                                                                                                                                                                                                                                                                                                                                                                                                                                                                                                                                                                                                                                                                                                                  |
| CPEB1A | <p>ATGGATTTCCGCAGGGGAAAGAAGAATTGCTGTTATCCCGCTTATGGAGAATGGTTAG<br/>         CTCACAGGGCCTTTGGGCCCTTCATAGGTGCCAAACAACACACCAATTGGAAACACAC<br/>         ACATGATGGTTCAGGCTCTTCCACAGTTAGCAGTATGCTGTTGGCTCCAGAGCAGCAGG<br/>         ATCATCCGGCCGCTGTGCCAGCGATGAAGAGCTCAGTCTGGGCCTGCTATCGCTCGCT<br/>         CTCCCCTGCTGGTATCAGGAGCTCTGGAGCCGCCCTGAAGCCCAGCGGGATGTCCAGA<br/>         CTCCATTGAATCTCTTGGGTTTCATCACGAGGTGATGGTGATTGGGTTTCAGCATCAGGCT<br/>         CTCCAGGCCCATGAGTCTGCAGGAGGACGAGATCACTGACCCCCACACTGGAGACTC<br/>         ACTCTCTGCTACACTCCGGCTCCAGCAGCCCTGTCAACTCCGAGAACAGCGCCGCTCTCT<br/>         TCAGGGTCAGAGCACCTGGCGTCTCTCAGAGTTTCTCCTCCGTTGCCGCTGTTGCTCTCA<br/>         GGACTGCGTGTGGAGGACCTGAAATTAGGCTCAGATGTTGGTTTGGATCAGAATCCGCT<br/>         GAACACCTTCATGAACGCCTCCAGCGGCCGGGCTGAGGGCTCCGTTTTCAGCCGCTGGT<br/>         CCACAGGTCCCGTCTGGCCAGGCTGGGACACTTTGGGCTGAATAAACCCCTCATTCTGC<br/>         ATCGAGAGAGAGGCGAAGCTTCATAAAACAAGCTGCAGCCGTGAATGAAGCCTCATACA<br/>         GCTGGGAGGGAAGTCTTCTCCGCGTCACTACAAAACCCCAAGTACTCGTGTAAGTG<br/>         TTTCTGGGAGGAGTGCCGTGGGACATCACAGAGGCGAGTCTGCAGAGCACATTTAGTG<br/>         TATTTGGCCATTGAAAGTGGAGTGGCCTGGTAAAGATGGCAAACATCCGCGATGTCTCT<br/>         CCTCAAGGTTATGTCTATCTACTGTTTACTGGGAGAAGTCTGTGAAGTCTCTCCTGCA<br/>         GGCATGTACTCAACACCGCCTGCAGGCCGACGACTATCTCCAGTTTTACTACAAACTCT<br/>         CCAGCAGGAGGATCCACAGCAAAGACGTGCAGGTCAATCCCTGGGTGATTTTCAGACAG<br/>         TAATTTTATCCGCTGTCCCTCTCAGCGCCTCTGCCGCAATAAGACTGTGTTTGTGGGCGC<br/>         TCTGCACGGGATGCTGAACGCTGAGGGTCTGGCTCACATCATGGATGAGCTCTTTGGGG<br/>         GTGTCATGTACGCCGCATCGACACAGACAAGCACAAGTATCCTATAGGTTTCAGGCAG<br/>         AGTGACGTTTCAGGAGCCAGAGGAGCTACTTGAAGCTGTCACTGCAGCATTGTGTCAG</p>                       |

|              |                                                                                                                                                                                                                                                                                                                                                                                                                                                                                                                                                                                                                                                                                                                                                                                                                                                                                                                                                                                                                                                                                                                                                                                                                                                                                                                                                                                                                                                                                                                                                                                                                                                                                                                                                                                                                                                                                                                                                                                                                                                                                                                                                                                                                                                                                                                                                                                                                                                                                                                                                                                                                                                                                                                                                                                                                                                                                                                                                                                                                                                                                                                                                                                                                                                                                                                                                                                                                                                                                                                                                                                                                                                                                                                                                                                                                                                                                                                                                                                                                                                                                                                                                                                                                                                            |
|--------------|------------------------------------------------------------------------------------------------------------------------------------------------------------------------------------------------------------------------------------------------------------------------------------------------------------------------------------------------------------------------------------------------------------------------------------------------------------------------------------------------------------------------------------------------------------------------------------------------------------------------------------------------------------------------------------------------------------------------------------------------------------------------------------------------------------------------------------------------------------------------------------------------------------------------------------------------------------------------------------------------------------------------------------------------------------------------------------------------------------------------------------------------------------------------------------------------------------------------------------------------------------------------------------------------------------------------------------------------------------------------------------------------------------------------------------------------------------------------------------------------------------------------------------------------------------------------------------------------------------------------------------------------------------------------------------------------------------------------------------------------------------------------------------------------------------------------------------------------------------------------------------------------------------------------------------------------------------------------------------------------------------------------------------------------------------------------------------------------------------------------------------------------------------------------------------------------------------------------------------------------------------------------------------------------------------------------------------------------------------------------------------------------------------------------------------------------------------------------------------------------------------------------------------------------------------------------------------------------------------------------------------------------------------------------------------------------------------------------------------------------------------------------------------------------------------------------------------------------------------------------------------------------------------------------------------------------------------------------------------------------------------------------------------------------------------------------------------------------------------------------------------------------------------------------------------------------------------------------------------------------------------------------------------------------------------------------------------------------------------------------------------------------------------------------------------------------------------------------------------------------------------------------------------------------------------------------------------------------------------------------------------------------------------------------------------------------------------------------------------------------------------------------------------------------------------------------------------------------------------------------------------------------------------------------------------------------------------------------------------------------------------------------------------------------------------------------------------------------------------------------------------------------------------------------------------------------------------------------------------------------------------|
|              | <p>ATAAAAACCTCCAAGTTTACCAAGAAGGTCCAGATTGACCCGTATCTGGATGACTCCAT<br/>                 CTGCCAAATATGTAGCAGTCAGCCTGGGCCGTTCTTCTGTAGGGCTCAGGCCTGTTTAA<br/>                 AATACTACTGTCGGTTCATGCTGGCACTGGCGTCACTCCCTGGACGTGTTGAGCAGCCAT<br/>                 CAGCCTCTCATGCGCAACCAGAAGAGCCTAAACCCAACCTAA</p>                                                                                                                                                                                                                                                                                                                                                                                                                                                                                                                                                                                                                                                                                                                                                                                                                                                                                                                                                                                                                                                                                                                                                                                                                                                                                                                                                                                                                                                                                                                                                                                                                                                                                                                                                                                                                                                                                                                                                                                                                                                                                                                                                                                                                                                                                                                                                                                                                                                                                                                                                                                                                                                                                                                                                                                                                                                                                                                                                                                                                                                                                                                                                                                                                                                                                                                                                                                                                                                                                                                                                                                                                                                                                                                                                                                                                                                                                                                                                      |
| <p>C-MET</p> | <p>ATGACAATTCACTATTCTGAAGCTGCTTCCATCCTAATCATCCTTCAGTCGCTGTGGTGG<br/>                 GGCTTGAATTGTCAATGTGAGGAACCAATAGAAAAGCTCCAAACTCGACCTCTCAGTGA<br/>                 CCTATGACCTCCCTTACTTTGTGTCTGACACCCCATTCAGAAGCTGTTGGAAATCAAT<br/>                 GGAACAGTGTATGTCGGTGCCGTCATAGACTTTACGCTCTGTGCAAAAGACCTGAAGA<br/>                 AGAAACATGAGTATAAGACTGGACCGGTCCATGAGGGTCCAGACTGCAAGACCCCAAC<br/>                 AGATCAATGCAGTGGTTGTGAAAACAAGCCCCGTAACATAAAACAACACCAATATGGCC<br/>                 CTGTTAATGGAGACGTTCTATGACCTGGAACCTTTTCAGCTGTGGCTCAGTCGGGAATGG<br/>                 CGTCTGCAGTCGTCATGTGTTAGAGGATGGGCCTCTGGGTGCGGAAGTAACTTGCATGT<br/>                 ACACCAAAAAGAATGAAGGCAGCAGCCATGGATGCCAGACTGCCTGGCTGGACCTGC<br/>                 GGGCACTCAGATCCTCAACATAATGAGCGGTCTGTTGTGAGGTTCTTCGTTGCGAACT<br/>                 CTGAACCTCTTGAGTCAAACGGTCCACGTCTCCACCACACTATTTCCATTAGGAAGATG<br/>                 CGTGAACCTCAAGATGGCTTTGAGTTCTTTTCCGATCAGTCCTACATGGATTGGCCCT<br/>                 TCACTGCGGGGGAACCTATCCACTACATTATGTCTACTCTTCCAGAGTGGTCTTATGTA<br/>                 TATTTTCTCACCGTCCAACGCGAAGGTGGCAACTCGAAAAGCTTCCACACGAGAATCGT<br/>                 ACGCATGTGTTCTTCAGATTCTGAGATCCTGCGTTATGTAGAAATGCCCTTTGAGTGCA<br/>                 TTTACTCTGAGCGAAGGAGAAAAAAGCGTTCGGCTCAAGTGGTTTTCAACGTTCTCCAG<br/>                 GCTGCTCATGTGGCCAAAGTTGGCTATGACTTTCAGCAGGAGATGGGCTTGAAGAAG<br/>                 GAGAGGACGTGCTGTTGCTGCCTTTGCCCGGAGCAAACCGGACTCACCAGAGCCCAC<br/>                 CGCAGCTCCGCCGTTTGCCTTATCTCCATCACGGACATCAATGAATTCTTCAAGGTTTT<br/>                 CATTCAGAAGGGTTACACAAGGAAACTCCATCACTTTCAGGATCTGAAGAGAAAAAC<br/>                 TTCAACCAGACGTTTGTAGGAGATTCTTTCAGCTGTGGGAAACATGAAAGAGGCTATC<br/>                 GGCTAGAAGTTACAAGCACCAACCCGCGCCGGGACTATTTTCATGGCCGCTTCGGAAT<br/>                 GTTCTTCTCACTTCCATAGCTGTGGTGCCGATCCAAAACCACACTGTGGTCAGCCTTGG<br/>                 CACAGCTGAAGGCCGCGTCATCCAGGTGGTGGTTTCCCGCTTTGGCAAGACAGAGCCA<br/>                 CATGTGGACTTCCGCTTGGACACGCTCCCTGTGTCTTCAGAAATGGCCCTGCTGTCTCC<br/>                 ACAGCATCACAACGGCTCCTTATTGTTGATAACAGGAAACAAGGTCTCAAAGCTTCTGCT<br/>                 TGATCGGGCCTGGATGTGAGCAGTTGTGGACTTGTAGCTCGTGTCTTCTTGTCCGGGC<br/>                 TTCATGGGCTGTGGATGGTGCAGGACCAGCAACCTGTGCACCAGGGCCCCCTCGATGCC<br/>                 CCCAGTCCCAATGGATCCAGGACTCCTGCCCTCCTCATCACCTCGATCTCTCTTCTCT<br/>                 CCGCTCCACTCAGAGGTCAAACCAACATCACAATCTGTGGCAAAAACCTTTGGCTTTAAC<br/>                 AAAAAAGACAGATTTGATACCAAACCTGATAGACGTGGTGGTTGCTGGAACGAAGTGTA<br/>                 AATTGGAAAGGAAGGACAGTAACAATAATCGGTTGGTCTGTGGACTGGATCATGTGAA<br/>                 CTGGTCCAGCGTGGACTCTGTGGTCACTGTCAGCGGTTCACTTGGACAGTGGAAATGTGCAA<br/>                 AAGATGGCTTCTCATTGTTGAATCCAGTTATCATAGAGATCTTCCAGAGTTTGGACCTCA<br/>                 GTCTGGTGGGACAATGCTCACTATCAGCGGTTCACTTGGACAGTGGAAATGTGCAAAA<br/>                 CAGTCACAGTGGGGAACGCTACCTGTGTGCTGCAGAGTGTTCAGCCACAATGTTAACA<br/>                 TGTCGTACACCACCTCAGCCCTCGCCATCCCAACACAAGGTACAGCTGCACATTGATGG<br/>                 AGTAATATTTGAAGCGCCTGTCAGCTACACCTACAACAAGAACCACACATCTCCAGC<br/>                 GTCCAGCCCAAACATTTCTTTCATCAGTGGAGGAAGCACGGTGACAGTGAATGGCTTCTA<br/>                 CCTGCACTCAGCTCTTCAGCCTCAGATGGTTCTCACTGCTGCCACTGAGGGCAAACCTCT<br/>                 TCCAAGTGACCTGCAGTCATGATGAGGATAAGAGAAATATCCTTTGCATCACGCCCTCC<br/>                 CTGAAAGGCCTCAGCGTTCAGCCTCCGGTCGCCACTAAAATGACCTTCGTCTCTGGATGG<br/>                 TTTTCCACTGATCAGTACGACCTGCTGTACGTGGAAGATCCCAAATTTGAGGAGTTTC<br/>                 AGAAGCCCACTGTCACACCAAGGGGCAAAAAGAACATTCTGGAGATTAAGTCCCCCTC<br/>                 TGTGAATCAAGAGCGGTGAAAACCGGTGAGGTGCTGAGAGTTTCAAATCGGACCTGC<br/>                 GAGAGTGTCACTTTGGTGGGCAACACGCTCGAATGCACCGTACCCATGGAGCTCCAGA<br/>                 CCGCCGCCAAAGAGCTGGAGGTGGAGTGAAGCAGGCCACATCATCTGTGATCTTGGG<br/>                 CCGTGTGATTTTGGCTCAAGACCAGGATTACAGGATACTGATCACTGGAGGAGTGTGTG<br/>                 TGTCATCCTCCTCCTGCTCCTGATCGCTGTGTTTGGTATCAAGAGAAAGAAGCAC<br/>                 ATTAATGATTTAGCTAAGACTATGGTTTGGTATGACGGCCGGGCTCACATTCGCACTT<br/>                 GGACATGTTGGCAAACGCGAGGAGTGCAGTCCCACTAATGAAATGGTCTCTCACGAG</p> |

|      |                                                                                                                                                                                                                                                                                                                                                                                                                                                                                                                                                                                                                                                                                                                                                                                                                                                                                                                                                                                                                                                                                                                                                                                                                                                                                                                                                                                                                                                                        |
|------|------------------------------------------------------------------------------------------------------------------------------------------------------------------------------------------------------------------------------------------------------------------------------------------------------------------------------------------------------------------------------------------------------------------------------------------------------------------------------------------------------------------------------------------------------------------------------------------------------------------------------------------------------------------------------------------------------------------------------------------------------------------------------------------------------------------------------------------------------------------------------------------------------------------------------------------------------------------------------------------------------------------------------------------------------------------------------------------------------------------------------------------------------------------------------------------------------------------------------------------------------------------------------------------------------------------------------------------------------------------------------------------------------------------------------------------------------------------------|
|      | <p>TCGGTGGACTATAGAACCACTTTGCTTGAGGACCAAACTTGCCTCTGTCTCAGACAGA<br/>         GTCCTGCCGGCCTCATCTCTACGCTCATTCCCATGTGGATCTGTCCCAATGCTCGGGCC<br/>         AATGGAAGGGGACCTGGCGTCTCCGCTGCTGCCCTCTACAGCGCCTATAGATCTAGGCA<br/>         GCCTCCATCCTGAGCTGCTGAAGGAGGTCCAGCATGTGGTCATCGCAAGAGAAGATCT<br/>         GCTCTTACATGTCAATGAGATCATCGGGAGAGGGCACTTCGGCTGCGTGTTCATGGAA<br/>         CCCTCCTCGAGCCAGATGGCCAGAAGCAGCACTGCGCCATCAAGTCCTTAAACCGAAT<br/>         CACAGATATCGAGGAGGTGTCTCAGTTTCTGAAGGAGGGCATCATCATGAAGGATTC<br/>         AGCCATCCCAATGTGCTTTCTCTGCTGGGAATCTGCCTGCCAGCGAGGGTTCGCCTCT<br/>         CGTCGTGTTGCCTTACATGAAGCACGGAGATCTGCGCAACTTTATCAGAGATGAAAGTC<br/>         ATAACCCACAGTGAAGGACCTGATGGGTTTCGGGCTGCAGGTGGCTAAAGGAATGGA<br/>         GTATCTCGCCAGCAAGAAATTTGTTACCGAGACCTCGCGGCCAGAACTGCATGCTG<br/>         GATGAGAGCTACACAGTGAAGGTGGCAGATTTTGGCCTGGCCAGAGACGTGTATGATA<br/>         AAGAATACTACAGCGTACACAACAAGCACGGAGTGAAGCTGCCTGTCAAATGGATGGC<br/>         GTTAAAGCCTGCAGACACACAAGTTCACAACCAAATCGGATGTGTGGTCACTTTGGT<br/>         GTTTTGCTGTGGAACTGATGACCCGAGGTCTCCGCCATACTCTGATGTGAACCTCTT<br/>         CGACATTACAGTGTCTTCTGCAAGGCCGAGACTGTTACAACCAGAGTTCTGCCCGG<br/>         ATGCACTCTATAATGTCATGATTGAGTGCTGGCACCCCAAACCCGAGCGTCGACCAACT<br/>         TTCTCAGAACTAGTGTCTCGCATCTCCGCCATCTTCTCAAGCTTCAGCGGAGAGCACTA<br/>         CATCCTCCTGAACACCACCTACGTCAACATCGACAAAATGACACCCTACCCCTCTCTCA<br/>         TATCATCTCAGAGCAACCTCGACCGCGACTGCTGCACCTGA</p> |
| EZH2 | <p>CCATCTACCTCTCTGAACAAATGCCTTACATACTTCAGGAATTCTCTCCACATGCATTC<br/>         CAATACAGTTTAGATAACGTTTTATAGGACAAGGGCATCTATTTGAGAAGATTTTAAACA<br/>         GTGATATTTGAAGACTTCCTTTTTTGACGACTTGTTTTTTTTCTTTTTTACACACGTG<br/>         ACCAACAGGCTTACTCTGGGATACACTTTCTGATAGTAACTGAACATTCTGTTTACAG<br/>         TAGAGCCATTTTGTAAACGGGCCATTTGTTTTGTATCTGGATTGTAGTTTTTTTTTTAAGTT<br/>         ATTTTGACAGTTTCTCTCTACCGTTGGACCAAAATTCACATTTAAACCGGCTGTATGTT<br/>         TGTATTACAAAAAAGAAAAGAGTATTTATATCACACAACCCCCAGCTCCGTTTTAAGCT<br/>         TTGTTCTTTGTGGAAACCAAAGCCACCGTCACTGCTTTGCATGCGAGTCTCTCAAGAAA<br/>         CAGTTTTTCTGGTGCCAATGCACAGTAATGACAACCGGAAGGTCAAATCAGTACCATAT<br/>         TGCAGTGCCTTGACTTGTTTGATAGTCTCTTTGATTTAGACAGTTTCTTAAATGGTGTA<br/>         CTCTAATTGTTGTCTGCATGAACAGCACTTTCATGTGGTGTGGAACGGGTGACTCGTC<br/>         ATTCCTCACTGTTATTGTACATTGTTTTGTAAGGTTTGTCCAGACAGTTGCCACTAAATG<br/>         TAAAGCGATCGACTCAAGGTGCTGTTCTTCTCCTCCCTGCTTACGTGAAAAAACAATC<br/>         ACTTTTTTTTTTTTTTTTACTGAACAGGGGATACTGTAAATCAAAGCAATAATACCAGGC<br/>         TTGACTCCAGACTCCCTATTTATTTTATGAGTGTCTAATTTATTGATGGCTATCAGTTG<br/>         CTGTGATTTGTCCGTGAGTATTAGGGAGTTCTTAATTAGATGATTTCTGTTTTGCTTAC<br/>         TTAATCTGATGCTCCATTTGTTTATAAGGGTTTTTGACCACTCCATCTCCCATGTTGTTG<br/>         CCTCCAAATACAAGGTGCTGTTCAATTGTTTACAGGGACTTGTTAAACGTGAGAAAATA<br/>         AACATTGAAAATAACTGTCAAAAAAAAAAAAAAAAAA</p>                                                      |
